# Supplementary material for: Anti-Inflammatory Therapy for Temporomandibular Joint Osteoarthritis Using mRNA Medicine Encoding Interleukin-1 Receptor Antagonist
Source: MDPI journal article supplement (doi:10.3390/pharmaceutics14091785), 2022-08-26
Supplement: s1 [file s1]

## **Supplemental Materials**

### **Anti-inflammatory Therapy for Temporomandibular Joint Osteoarthritis Using mRNA Medicine Encoding Interleukin-1 Receptor Antagonist**

Jia Deng<sup>1,2</sup>, Yuta Fukushima<sup>1</sup>, Kosuke Nozaki<sup>3</sup>, Hideyuki Nakanishi<sup>1</sup>, Erica Yada<sup>1,4</sup>, Yuki Terai<sup>1</sup>, Kenji Fueki<sup>2</sup>, Keiji Itaka<sup>1,5\*</sup>

<sup>1</sup>Department of Biofunction Research, Institute of Biomaterials and Bioengineering, Tokyo Medical and Dental University (TMDU), 101-0062 Tokyo, Japan;

<sup>2</sup>Department of Masticatory Function and Health Science, Graduate School of Medical and Dental Sciences, Tokyo Medical and Dental University (TMDU), 113-8549 Tokyo, Japan;

<sup>3</sup>Department of Advanced Prosthodontics, Graduate School of Medical and Dental Sciences, Tokyo Medical and Dental University (TMDU), 113-8549 Tokyo, Japan;

<sup>4</sup>NanoCarrier Co., Ltd. 104-0031 Tokyo, Japan

<sup>5</sup>Innovation Center of NanoMedicine (iCONM), Kawasaki Institute of Industrial Promotion, 210-0821 Kawasaki, Kanagawa, Japan

### Supplemental Figure S1

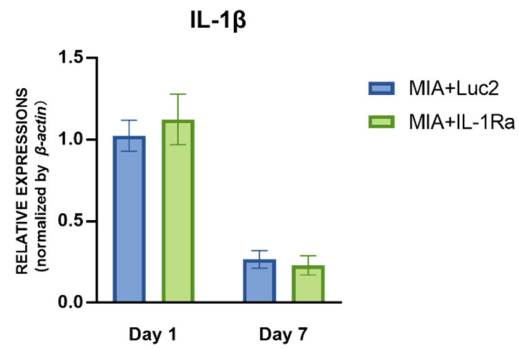

**Figure S1.** The expression levels of Interleukin-1 $\beta$  (IL-1 $\beta$ ) on the 1<sup>st</sup> day and 7<sup>th</sup> day after the mRNA treatment.  $\beta$ -actin expression was used for normalization. Animal number = 6/group.

**Table S1.** Comparison of physicochemical properties between lipid nanoparticles and polyplex nanomicelles for loading mRNA.

|                                                  | <b>Lipid Nanoparticles-mRNA</b>                                                                                                                          | <b>Polyplex Nanomicelles</b>                                                                     |
|--------------------------------------------------|----------------------------------------------------------------------------------------------------------------------------------------------------------|--------------------------------------------------------------------------------------------------|
| <b>Components</b>                                | Cationic/ionizable lipids and helper lipids such as phospholipids, cholesterol, or polyethylene glycol (PEG)-functionalized lipids (PEG-lipids) [15, 16] | Block copolymers composed of PEG and cationic polyamino acid [3-5]                               |
| <b>Structure</b>                                 | A core-shell structure with mRNA encapsulated in the core in general but highly variable in structure [19-20]                                            | A core-shell structure surrounded by dense PEG palisade with mRNA encapsulated in the core [3-5] |
| <b>Assembling</b>                                | Self-assembled mainly driven by hydrophobic interactions and guided by electrostatic interactions [18]                                                   | Self-assembled by electrostatic interactions [3-5]                                               |
| <b>Size</b>                                      | Changeable based on applications and components [18, 21]                                                                                                 | Regulated between 50-100 nm [6]                                                                  |
| <b>Administration route</b>                      | Applicable for various routes e.g., intravenous (i.v.) and local administration.                                                                         | Various Local administration routes [9-15] and hydrodynamic intravenous injection [8]            |
| <b>Biodistribution after i.v. administration</b> | Accumulations in the liver and lymph nodes [22, 23]                                                                                                      | -                                                                                                |
| <b>Immune response after administration</b>      | Considerable immune responses, which could work as adjuvant for vaccination [1, 2]                                                                       | Less or no immune response [6, 7, 9, 14]                                                         |

#### References for Table S1

1. Kedmi, R.; Ben-Arie, N.; Peer, D. The systemic toxicity of positively charged lipid nanoparticles and the role of Toll-like receptor 4 in immune activation. *Biomaterials* **2010**, *31*, 6867-6875, doi:10.1016/j.biomaterials.2010.05.027.
2. Sedic, M.; Senn, J.J.; Lynn, A.; Laska, M.; Smith, M.; Platz, S.J.; Bolen, J.; Hoge, S.; Bulychev, A.; Jacquinet, E.; et al. Safety Evaluation of Lipid Nanoparticle-Formulated Modified mRNA in the Sprague-Dawley Rat and Cynomolgus Monkey. *Vet Pathol* **2018**, *55*, 341-354, doi:10.1177/0300985817738095.
3. Kanayama, N.; Fukushima, S.; Nishiyama, N.; Itaka, K.; Jang, W.D.; Miyata, K.; Yamasaki, Y.; Chung, U.I.; Kataoka, K. A PEG-based biocompatible block cationomer with high buffering capacity for the construction of polyplex micelles showing efficient gene transfer toward primary cells. *ChemMedChem* **2006**, *1*, 439-444, doi:10.1002/cmdc.200600008.
4. Uchida, H.; Miyata, K.; Oba, M.; Ishii, T.; Suma, T.; Itaka, K.; Nishiyama, N.; Kataoka, K. Odd-even effect of repeating aminoethylene units in the side chain of N-substituted

polyaspartamides on gene transfection profiles. *J Am Chem Soc* **2011**, *133*, 15524-15532, doi:10.1021/ja204466y.

5. Uchida, H.; Itaka, K.; Nomoto, T.; Ishii, T.; Suma, T.; Ikegami, M.; Miyata, K.; Oba, M.; Nishiyama, N.; Kataoka, K. Modulated protonation of side chain aminoethylene repeats in N-substituted polyaspartamides promotes mRNA transfection. *J Am Chem Soc* **2014**, *136*, 12396-12405, doi:10.1021/ja506194z.
6. Itaka, K.; Kataoka, K. Progress and prospects of polyplex nanomicelles for plasmid DNA delivery. *Curr Gene Ther* **2011**, *11*, 457-465, doi:10.2174/156652311798192879.
7. Uchida, S.; Itaka, K.; Uchida, H.; Hayakawa, K.; Ogata, T.; Ishii, T.; Fukushima, S.; Osada, K.; Kataoka, K. In vivo messenger RNA introduction into the central nervous system using polyplex nanomicelle. *PLoS One* **2013**, *8*, e56220, doi:10.1371/journal.pone.0056220.
8. Matsui, A.; Uchida, S.; Ishii, T.; Itaka, K.; Kataoka, K. Messenger RNA-based therapeutics for the treatment of apoptosis-associated diseases. *Sci Rep* **2015**, *5*, 15810, doi:10.1038/srep15810.
9. Aini, H.; Itaka, K.; Fujisawa, A.; Uchida, H.; Uchida, S.; Fukushima, S.; Kataoka, K.; Saito, T.; Chung, U.I.; Ohba, S. Messenger RNA delivery of a cartilage-anabolic transcription factor as a disease-modifying strategy for osteoarthritis treatment. *Sci Rep* **2016**, *6*, 18743, doi:10.1038/srep18743.
10. Lin, C.Y.; Perche, F.; Ikegami, M.; Uchida, S.; Kataoka, K.; Itaka, K. Messenger RNA-based therapeutics for brain diseases: An animal study for augmenting clearance of beta-amyloid by intracerebral administration of neprilysin mRNA loaded in polyplex nanomicelles. *J Control Release* **2016**, *235*, 268-275, doi:10.1016/j.jconrel.2016.06.001.
11. Crowley, S.T.; Fukushima, Y.; Uchida, S.; Kataoka, K.; Itaka, K. Enhancement of Motor Function Recovery after Spinal Cord Injury in Mice by Delivery of Brain-Derived Neurotrophic Factor mRNA. *Mol Ther Nucleic Acids* **2019**, *17*, 465-476, doi:10.1016/j.omtn.2019.06.016.
12. Lin, C.Y.; Crowley, S.T.; Uchida, S.; Komaki, Y.; Kataoka, K.; Itaka, K. Treatment of Intervertebral Disk Disease by the Administration of mRNA Encoding a Cartilage-Anabolic Transcription Factor. *Mol Ther Nucleic Acids* **2019**, *16*, 162-171, doi:10.1016/j.omtn.2019.02.012.
13. Fukushima, Y.; Uchida, S.; Imai, H.; Nakatomi, H.; Kataoka, K.; Saito, N.; Itaka, K. Treatment of ischemic neuronal death by introducing brain-derived neurotrophic factor mRNA using polyplex nanomicelle. *Biomaterials* **2021**, *270*, 120681, doi:10.1016/j.biomaterials.2021.120681.
14. Oyama, N.; Kawaguchi, M.; Itaka, K.; Kawakami, S. Efficient Messenger RNA Delivery to the Kidney Using Renal Pelvis Injection in Mice. *Pharmaceutics* **2021**, *13*, doi:10.3390/pharmaceutics13111810.
15. Hashimoto, Y.; Kuniishi, H.; Sakai, K.; Fukushima, Y.; Du, X.; Yamashiro, K.; Hori, K.; Imamura, M.; Hoshino, M.; Yamada, M.; et al. Brain Dp140 alters glutamatergic transmission and social behaviour in the mdx52 mouse model of Duchenne muscular dystrophy. *Prog Neurobiol* **2022**, *216*, 102288, doi:10.1016/j.pneurobio.2022.102288.
16. Blanco, E.; Shen, H.; Ferrari, M. Principles of nanoparticle design for overcoming biological barriers to drug delivery. *Nat Biotechnol* **2015**, *33*, 941-951, doi:10.1038/nbt.3330.
17. Semple, S.C.; Akinc, A.; Chen, J.; Sandhu, A.P.; Mui, B.L.; Cho, C.K.; Sah, D.W.; Stebbing, D.; Crosley, E.J.; Yaworski, E.; et al. Rational design of cationic lipids for siRNA delivery. *Nat Biotechnol* **2010**, *28*, 172-176, doi:10.1038/nbt.1602.
18. Kim, J.; Eygeris, Y.; Gupta, M.; Sahay, G. Self-assembled mRNA vaccines. *Adv Drug Deliv Rev* **2021**, *170*, 83-112, doi:10.1016/j.addr.2020.12.014.
19. Yanez Arteta, M.; Kjellman, T.; Bartesaghi, S.; Wallin, S.; Wu, X.; Kvist, A.J.; Dabkowska, A.; Székely, N.; Radulescu, A.; Bergenholtz, J.; et al. Successful reprogramming of cellular protein production through mRNA delivered by functionalized lipid nanoparticles. *Proc Natl Acad Sci U S A* **2018**, *115*, E3351-e3360, doi:10.1073/pnas.1720542115.

20. Kulkarni, J.A.; Witzigmann, D.; Leung, J.; van der Meel, R.; Zaifman, J.; Darjuan, M.M.; Grisch-  
Chan, H.M.; Thöny, B.; Tam, Y.Y.C.; Cullis, P.R. Fusion-dependent formation of lipid  
nanoparticles containing macromolecular payloads. *Nanoscale* **2019**, *11*, 9023-9031,  
doi:10.1039/c9nr02004g.
21. Heyes, J.; Hall, K.; Tailor, V.; Lenz, R.; MacLachlan, I. Synthesis and characterization of novel  
poly(ethylene glycol)-lipid conjugates suitable for use in drug delivery. *J Control Release* **2006**,  
*112*, 280-290, doi:10.1016/j.jconrel.2006.02.012.
22. Hou, X.; Zaks, T.; Langer, R.; Dong, Y. Lipid nanoparticles for mRNA delivery. *Nat Rev Mater*  
**2021**, *6*, 1078-1094, doi:10.1038/s41578-021-00358-0.
23. Pardi, N.; Tuyishime, S.; Muramatsu, H.; Kariko, K.; Mui, B.L.; Tam, Y.K.; Madden, T.D.; Hope,  
M.J.; Weissman, D. Expression kinetics of nucleoside-modified mRNA delivered in lipid  
nanoparticles to mice by various routes. *J Control Release* **2015**, *217*, 345-351,  
doi:10.1016/j.jconrel.2015.08.007.
